# Supplementary material
Source: PubMed Central journal article supplement (PMC5813251)
Supplement: EMBJ-37-e97490-s001.pdf [file EMBJ-37-e97490-s001.pdf]

## **Appendix**

### **Table of contents**

Figures S1-S3, p. 2-4

Tables S1-S3, p. 5-7

Supplementary references, p.8

## Supplementary Figures

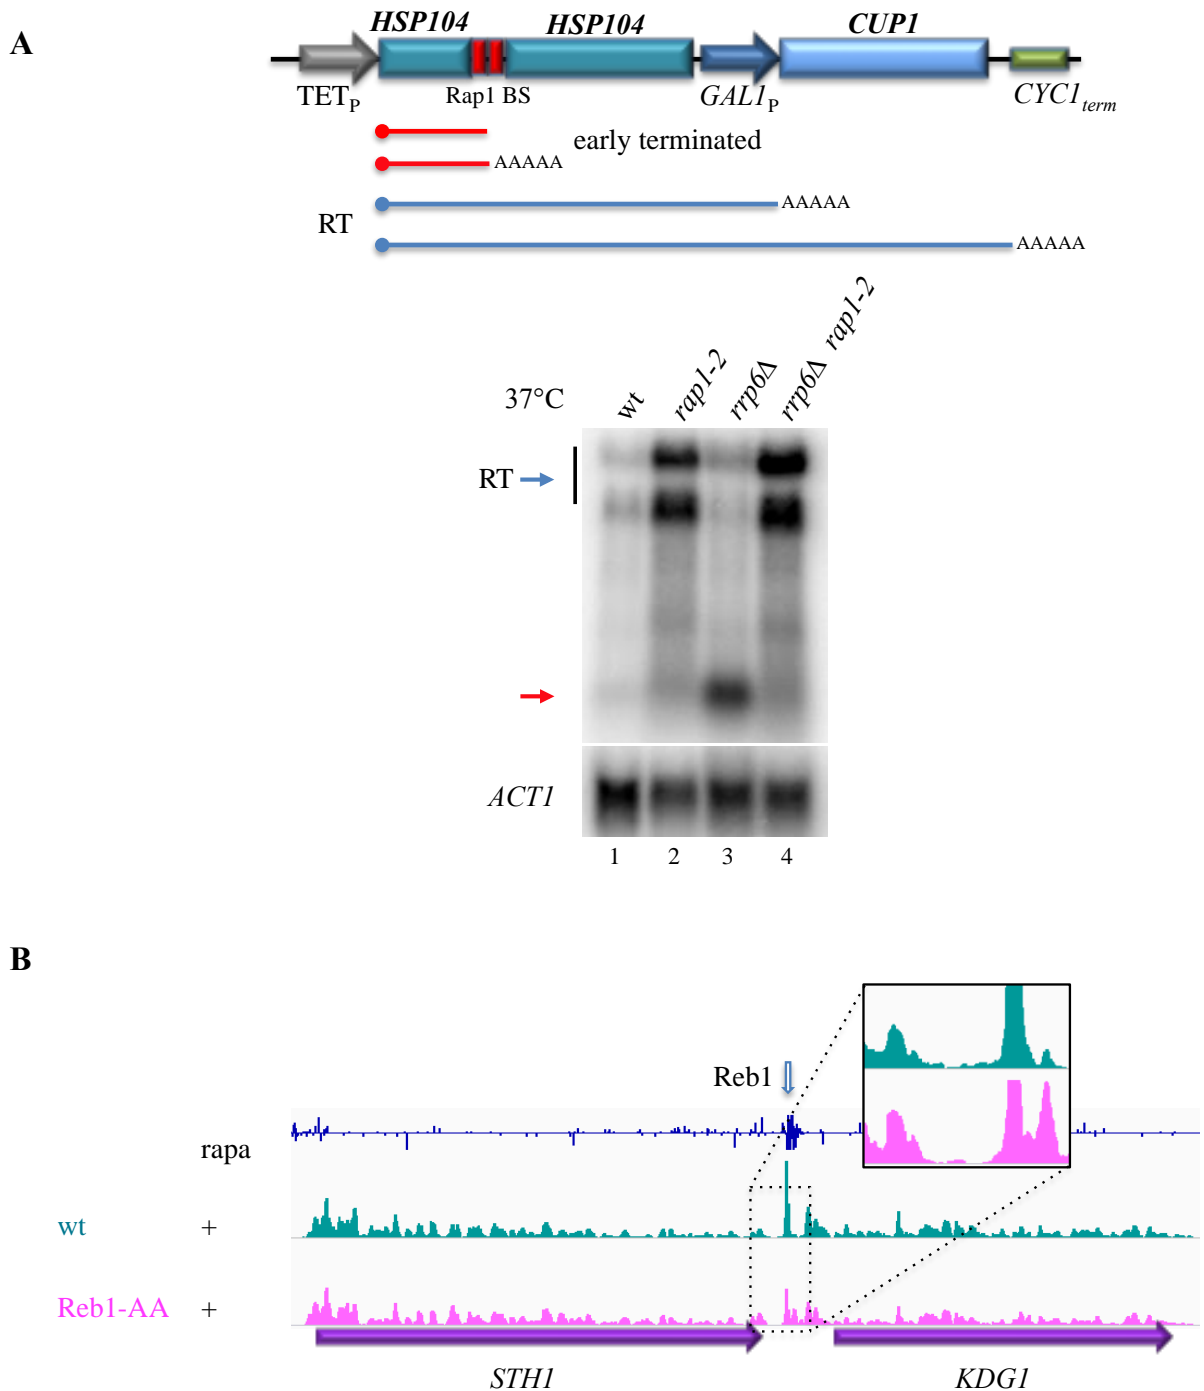

**Figure S1. A.** Northern blot analysis of transcripts derived from a construction containing the two Rap1 sites upstream of the *HYP2* gene in the context of the  $TET_p$ -*HSP104*- $GAL1_p$ -*CUP1* reporter (scheme shown on top). Strains have been grown at permissive temperature (25°C) and shifted to 37°C for 4 hour to inactivate the *rap1-2* thermosensitive mutant. The transcript derived from termination at the Rap1 sites is indicated by a red arrow. Because of its instability, this transcript is best detected in *rrp6Δ* cells (lane 2). **B.** Snapshot showing the RNAPII CRAC signal at a site of Reb1-dependent transcriptional roadblock. The roadblock peak decreases significantly upon nuclear depletion of Reb1 by the addition of rapamycin for 1 hour to the Reb1-AA strain. As a control, the parental strain (containing untagged Reb1) was also treated with rapamycin for the same time. The inset contains a magnification of the region of the roadblock illustrating the appearance of a readthrough signal upon Reb1 depletion.

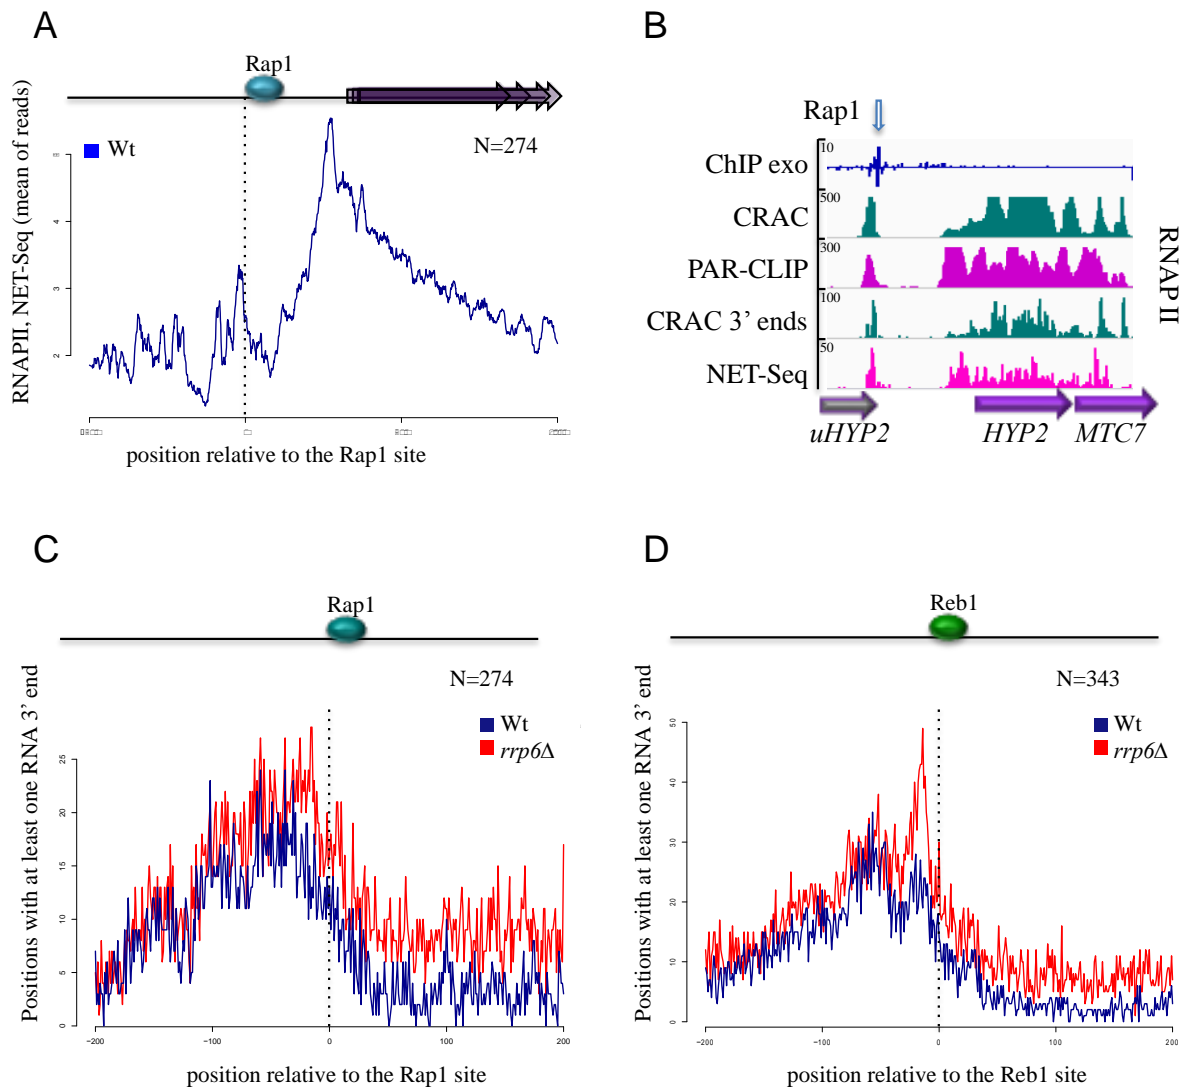

**Figure S2. A.** Metasite analysis analogous to the one shown in Figure 3A, but using NET-Seq, instead of CRAC data. **B.** Comparison of the CRAC, NET-Seq and PAR-CLIP signals at a site of Rap1 RB. For better comparison between CRAC and NET-Seq only the read 3' ends have been plotted in the last to tracks. Note the prominent presence of an RNAPII pausing peak revealed with all techniques. **C-D.** Aggregate distribution of RNA 3'-ends in wt or *rrp6Δ* cells as indicated upstream of Rap1 and Reb1 binding sites. The presence of these RNAs testifies to the occurrence of termination events at sites of roadblock.

**A**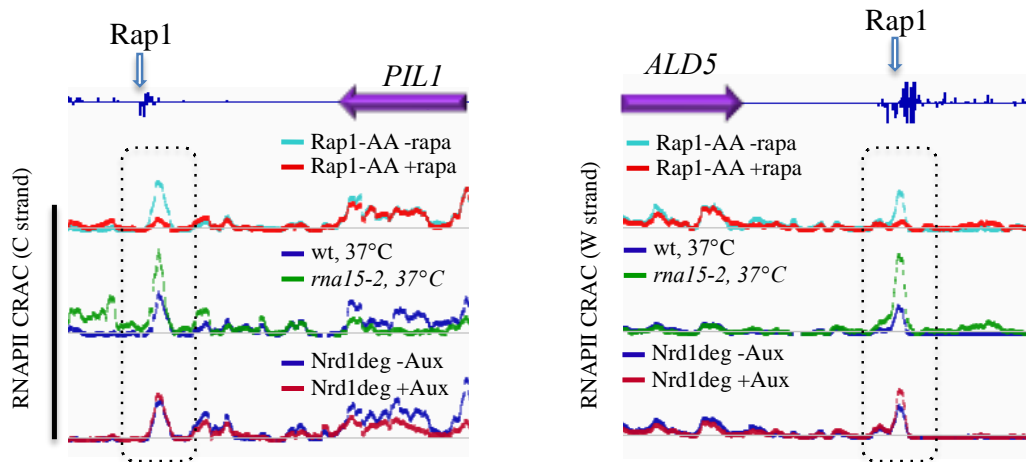**B**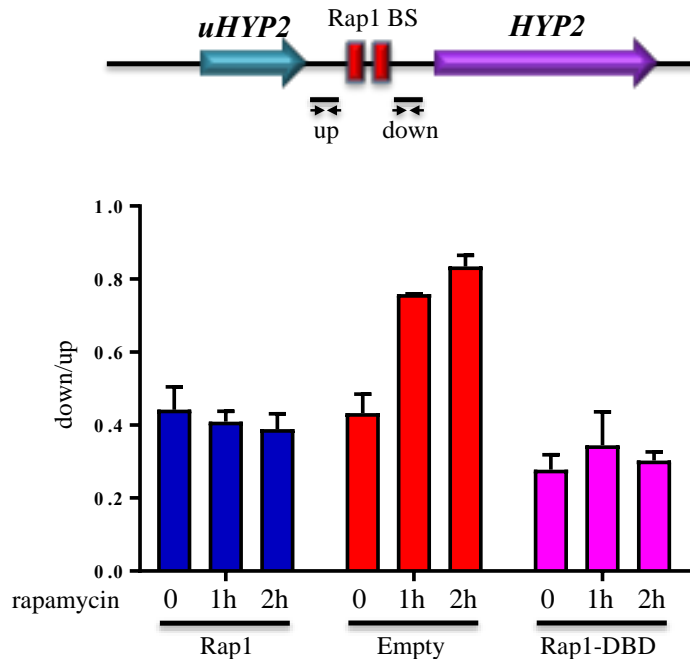

**Figure S3. A.** Representative snapshots illustrating the impact of the NNS complex on roadblock termination. The RNAPII CRAC signal at sites of roadblock termination downstream of *PIL1* and *ALD5* is shown (dotted rectangle). In both cases, the roadblock peak is insensitive to depletion of Nrd1 (bottom track, compare blue and red lines). As a control, the RB peak is strongly diminished by depletion of Rap1 (top track) and strongly increased upon mutation of the CPF pathway (middle track) because polymerases that fail to terminate at the CPF terminator accumulate at the RB site. **B.** Expression of the Rap1 DNA binding domain alone induces roadblock termination upstream of the *HYP2* locus. RT-qPCR analyses of transcripts around the Rap1 sites ( $n=2$ , error bars indicate the half difference between the replicates). The ratio between the RT-qPCR signal detected before (up) and after (down) the roadblock (down/up) is used as a measure of roadblock efficiency upon depletion of Rap1 in the presence of ectopic Rap1, the Rap1 DNA binding domain (Rap1-DBD) or an empty vector as indicated. Data have been corrected for the different efficiency of amplification of the two amplimers. A schematic representation of the *HYP2* locus is shown on the top. The amplimers used for the RT-qPCR analysis are located 46nt before the first Rap1 site (“up”) and immediately after the second Rap1 site (“down”).

**Table S1.** Strains used in this study

| Library # | Name                          | Genotype                                                                                  | Reference                      |
|-----------|-------------------------------|-------------------------------------------------------------------------------------------|--------------------------------|
| DLY671    | BMA64                         | <i>MATa ura3-1; ade2-1; his3-11,15; leu2-3,112; can1-100; trp1Δ</i>                       | F. Lacroute                    |
| DLY678    | <i>trf4Δ rrp6Δ</i>            | As BMA, <i>MATa; trf4::KAN; rrp6::URA</i>                                                 | Libri Lab                      |
| DLY815    | <i>rrp6Δ</i>                  | As BMA, <i>MATa; rrp6::KAN</i>                                                            | Libri Lab                      |
| DLY2241   | W303                          | <i>ade2-1; ura3-1; his3-11,15; trp1-1; leu2-3,112; can1-100</i>                           | (Thomas & Rothstein, 1989)9)   |
| DLY2207   | <i>rap1-2</i>                 | As W303 <i>MATa; rap1-2</i>                                                               | (Kurtz & Shore, 1991)1)        |
| DLY2242   | <i>rsp5-1</i>                 | As W303 <i>rsp5-1::HIS</i>                                                                | (Harreman <i>et al</i> , 2009) |
| DLY2547   | HHY212 Anchor away loxed      | As W303, <i>MATa ; tor1-1; fpr1::loxP; RPL13A-2xFKBP12::loxP; ura3-1</i>                  | (Haruki <i>et al</i> , 2008)   |
| DLY2568   | Reb1-AA                       | as DLY2547, <i>REB1-FRB::KAN</i>                                                          | this study                     |
| DLY2570   | Rap1-AA                       | as DLY2547, <i>RAP1-FRB::KAN</i>                                                          | this study                     |
| DLY2571   | Rpb1-HTP                      | As BMA, <i>MATa; RPBI-HTP::TRP1kl</i>                                                     | this study                     |
| DLY2736   | Reb1-AA Rpb1-HTP              | As DLY2568, <i>MATa; RPBI-HTP::TRP1kl</i>                                                 | this study                     |
| DLY2754   | Rpb1-HTP <i>rna15-2</i>       | As DLY2571, <i>MAT□□ rna15-2</i>                                                          | this study                     |
| DLY2838   | Rpb1-HTP Anchor away          | As W303; <i>MAT□□ RPBI-HTP::URAKl, tor1-1; fpr1::NAT; RPL13A-2xFKBP12::loxP-TRP1-loxP</i> | this study                     |
| DLY2840   | Rap1-AA Rpb1-HTP              | As DLY2838, <i>MAT□□□ RAP1-FRB-RAP1::LEU</i>                                              | this study                     |
| DLY2859   | WT AA Rpb1-HTP <i>rrp6Δ</i>   | As DLY2838, <i>MAT□ rrp6::HIS5Sp</i>                                                      | this study                     |
| DLY2860   | Reb1AA Rpb1-HTP <i>rrp6Δ</i>  | As DLY2736, <i>MATa rrp6::HIS5Sp</i>                                                      | this study                     |
| DLY2861   | Rap1 AA Rpb1-HTP <i>rrp6Δ</i> | As DLY2840, <i>MAT□ ; rrp6::HIS5Sp</i>                                                    | this study                     |
| DLY2867   | Rpb1-HTP Nrd1-AID             | As 2571, <i>MATa, RPBI-HTP::TRP1kl NRD1-3Flag-mAID, KAN::OsTIR1</i>                       | this study                     |
| DLY3080   | <i>rap1-2 rrp6::KAN</i>       | As DLY2207, <i>rrp6::KAN</i>                                                              | this study                     |

**Table S2.** Oligonucleotides used in this study

| Library #   | Sequence (5'-3')                                                    | Use                                 |
|-------------|---------------------------------------------------------------------|-------------------------------------|
| DL190       | TTGAGCCAACGTCAAATCGTTAGAGCCCTTTCTGTAAATTGCGTTTGGTCGTTTCAT           | Northern blot probe, against HSP104 |
| DL2627      | ATTCAAAAGCGAACACCGAATTGACCATGAGGAGACGGTCTGGTTTAT                    | Northern blot probe, U4             |
| DL3248      | AGCGTCCAGCTACAGCGT                                                  | RT-Q-PCR (uHYP2, up)                |
| DL3249      | AACGGGAACGGCGACTTG                                                  | RT-Q-PCR (uHYP2, up)                |
| DL3198      | TGTCGCCTCACACGGACC                                                  | RT-Q-PCR (uHYP2, down)              |
| DL3199      | CCTCGATGTATTCCGTAG                                                  | RT-Q-PCR (uHYP2,down)               |
| L3-6N-GA    | /5rApp/GCT <b>tc</b> NNNNNNAGATCGGAAGAGCGTCGTGTAGGGAAAGAGTGT/3ddC / | 3'-adapter                          |
| L3-6N-GU    | /5rApp/GCT <b>ac</b> NNNNNNAGATCGGAAGAGCGTCGTGTAGGGAAAGAGTGT/3ddC / | 3'-adapter                          |
| L3-6N-AC    | /5rApp/GCT <b>gt</b> NNNNNNAGATCGGAAGAGCGTCGTGTAGGGAAAGAGTGT/3ddC / | 3'-adapter                          |
| L3-6N-UC    | /5rApp/GCT <b>ga</b> NNNNNNAGATCGGAAGAGCGTCGTGTAGGGAAAGAGTGT/3ddC / | 3'-adapter                          |
| L5miRCat    | 5-/5InvddT/CTTGrGrCrArCrCrCrGrArGrArArUrUrCrCrA-3                   | 5'-adapter                          |
| RT L3-2     | 5-ACACTCTTCCCTACACGACGCTCTCCG-3                                     | RT primer                           |
| P5_3prime   | 5-AATGATACGGCGACCACCGAGATCTACACTCTTCCCTACACGACGCTCTCCGATCT-3        | PCR                                 |
| miRCat_PCR2 | 5-CAAGCAGAAGACGGCATACGAgatcCTTGGCACCCGAGAAT-3                       | PCR                                 |

**Table S3.** Plasmids used in this study

| Library | Name                                                                        | Description                                                                                               | Reference                   |
|---------|-----------------------------------------------------------------------------|-----------------------------------------------------------------------------------------------------------|-----------------------------|
| pDL431  | pCM190(TRP)-TET-HSP104-X3-HSP104-GAL1-LACZ                                  | Reporter containing a Reb1-dependent terminator                                                           | (Colin <i>et al</i> , 2014) |
| DL435   | pCM190(TRP)-TET-HSP104-X118-HSP104-GAL1-LACZ                                | Reporter containing a Rap1-dependent terminator                                                           | This study                  |
| DL468   | pCM190(URA)-TET-HSP104-X118-HSP104-GAL1-CUP1                                | Reporter containing a Rap1-dependent terminator                                                           | This study                  |
| DL436   | pCM190(TRP)-TET-HSP104-X118- $\Delta$ Rap1 BS-HSP104-GAL1-LACZ              | Same as DL435, containing a precise deletion of the Rap1 binding site                                     | This study                  |
| DL878   | pCM185(HIS)-P <sub>RAP1</sub> <i>RAP1</i>                                   | Plasmid expressing full length Rap1 under control of the <i>RAP1</i> promoter                             | This study                  |
| DL879   | pCM185(HIS)-P <sub>RAP1</sub> - <i>RAP1</i> - <i>DBD</i> <sub>358-601</sub> | Plasmid expressing the DNA binding domain of Rap1 (aa. 358-601) under control of the <i>RAP1</i> promoter | This study                  |

## SUPPLEMENTAL REFERENCES

- Colin J, Candelli T, Porrua O, Boulay J, Zhu C, Lacroute F, Steinmetz LM & Libri D (2014) Roadblock termination by reb1p restricts cryptic and readthrough transcription. *Mol. Cell* **56** 667–680
- Harreman M, Taschner M, Sigurdsson S, Anindya R, Reid J, Somesh B, Kong SE, Banks CAS, Conaway RC, Conaway JW & Svejstrup JQ (2009) Distinct ubiquitin ligases act sequentially for RNA polymerase II polyubiquitylation. *Proc. Natl. Acad. Sci. U. S. A.* **106** 20705–20710
- Haruki H, Nishikawa J & Laemmli UK (2008) The anchor-away technique: rapid, conditional establishment of yeast mutant phenotypes. *Mol. Cell* **31** 925–932
- Kurtz S & Shore D (1991) RAP1 protein activates and silences transcription of mating-type genes in yeast. *Genes Dev.* **5** 616–628
- Malabat C, Feuerbach F, Ma L, Saveanu C & Jacquier A (2015) Quality control of transcription start site selection by nonsense-mediated-mRNA decay. *eLife* **4**
- Thomas BJ & Rothstein R (1989) Elevated recombination rates in transcriptionally active DNA. *Cell* **56** 619–630
